# Supplementary material
Source: Springer Nature journal article supplement (https://www.springermedizin.de/resource/supplementary/12885_2013_4249_MOESM1_ESM.pdf/9466148)

## Additional files

### Additional file 1 as PDF

**Additional file 1: Figure S1** NF $\kappa$ B forms the central node of predicted NKX3.1 target genes within the human genome.

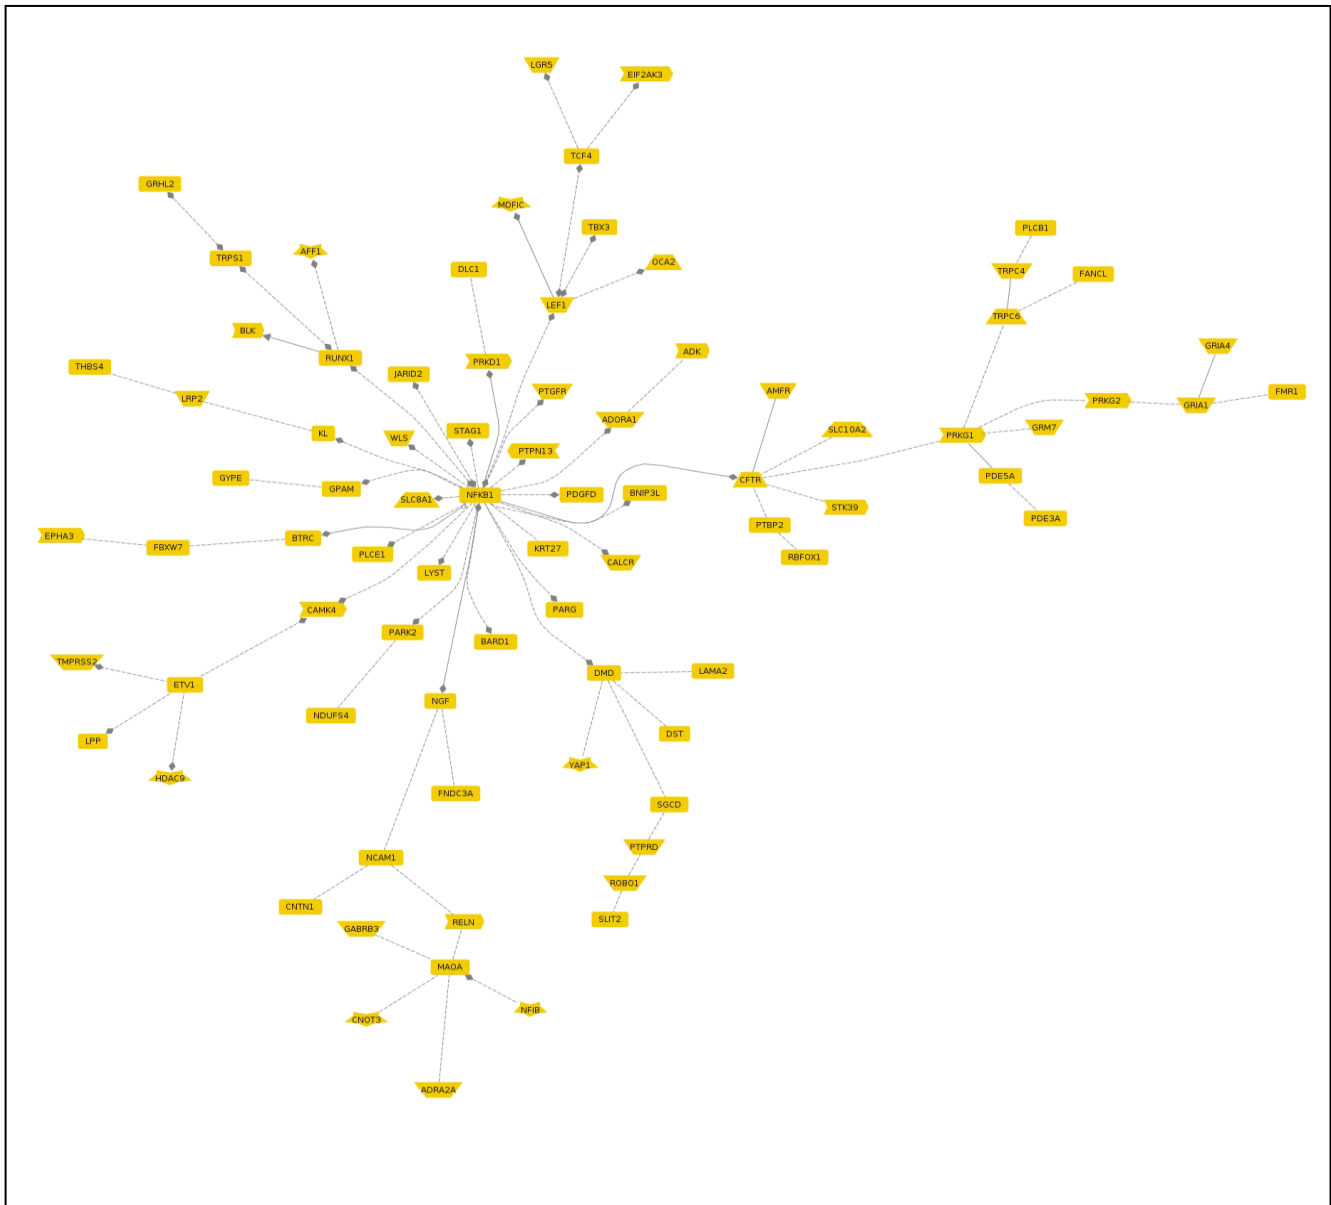

Supplement: MOESM1 [file 9466148]
